# Supplementary material for: Tyrosinase-catalyzed site-specific immobilization of engineered C-phycocyanin to surface
Source: PubMed Central journal article supplement (PMC4064347; doi:10.1038/srep05370), 2014-06-20
Supplement: srep05370-s1.pdf [file srep05370-s1.pdf]

## **Tyrosinase-catalyzed site-specific immobilization of engineered C-phycoyanin to surface**

Greta Faccio<sup>1\*</sup>, Michael M. Kämpf<sup>1</sup>, Chiara Piatti<sup>1,2</sup>, Linda Thöny-Meyer<sup>1</sup>, Michael Richter<sup>1\*</sup>

<sup>1</sup> Empa, Swiss Federal Laboratories for Materials Science and Technology - Laboratory for Bioactive Materials, Biocatalysis Group, Lerchenfeldstrasse 5, 9014 St. Gallen, Switzerland

<sup>2</sup> Dipartimento di Biotecnologie e Scienze della Vita, Università degli Studi dell'Insubria, via J.H. Dunant 3, 21100 Varese, Italy

### **\*Corresponding authors**

Dr. Michael Richter  
Group leader, Biocatalysis Group  
Empa - Laboratory for Bioactive Materials  
Lerchenfeldstrasse 5  
CH-9014 St. Gallen (Switzerland)  
Email: michael.richter@empa.ch  
Tel. +41-587657792

Dr. Greta Faccio  
Empa - Laboratory for Bioactive Materials  
Lerchenfeldstrasse 5  
CH-9014 St. Gallen  
Switzerland  
Email: greta.faccio@empa.ch  
Tel. +41-587657262

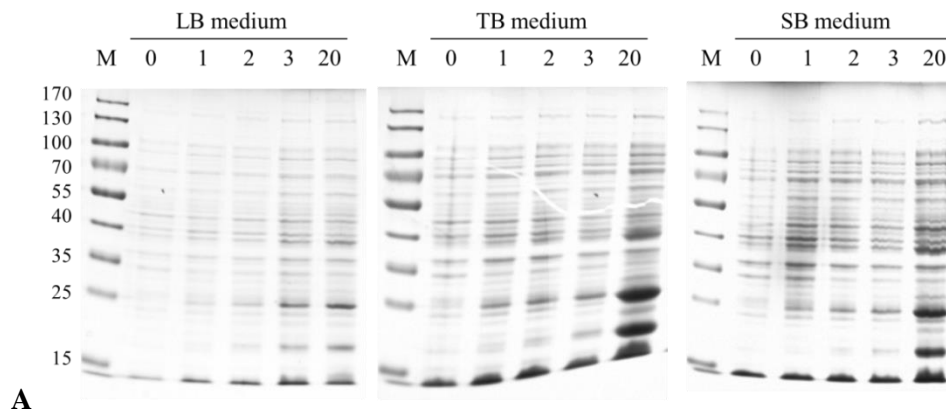

A

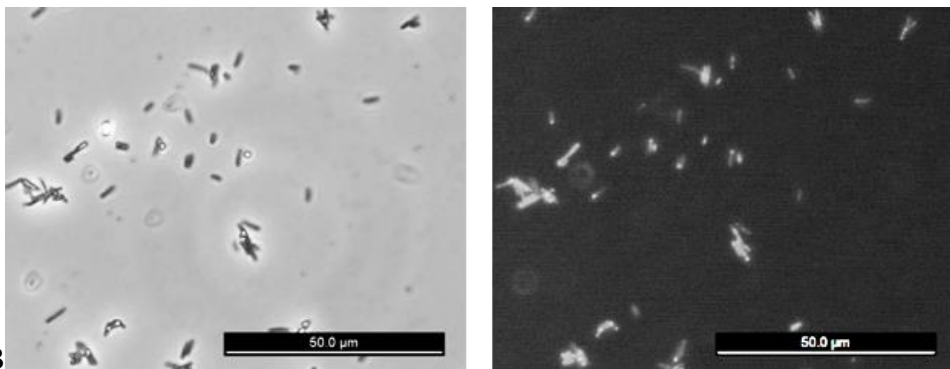

B

Supplementary Information S1 (A) SDS PAGE analysis of *E. coli* DH5 $\alpha$  cells expressing HisCPC and cultured in LB, TB and SB media. 1 ml of culture was sampled at different intervals after induction (reported above each lane, in h). (B) *E. coli* DH5 $\alpha$  cells producing recombinant HisCPC cultured in TB medium for 17 hrs. Cells visualised by phase contrast (left panel) and fluorescence with a N21 filter ( $\lambda_{\text{ex}}$  = 515-560 nm,  $\lambda_{\text{em}}$  = >590 nm, right panel).

Supplementary Information S2 Recombinant production of HisCPC in different conditions evaluated in the cell-free extract (CFE) and purified sample (values  $\pm$  standard deviation).

| Conditions | Temperature after induction (°C) | Agitation (rpm) | HisCPC in CFE (mg/g cells) | Purified HisCPC (mg/g cells) | $A_{620}/A_{280}$ of purified HisCPC | Purification Yield (%) |
|------------|----------------------------------|-----------------|----------------------------|------------------------------|--------------------------------------|------------------------|
| 1          | 37                               | 180             | 0.08 $\pm$ 0.03            | 0.03 $\pm$ 0.01              | 3.84 $\pm$ 2.35                      | 43%                    |
| 2          | 22                               | 0               | 0.37 $\pm$ 0.10            | 0.16 $\pm$ 0.04              | 1.31 $\pm$ 0.22                      | 45%                    |
| 3          | 27                               | 0               | 0.21 $\pm$ 0.03            | 0.13 $\pm$ 0.03              | 0.94 $\pm$ 0.13                      | 64%                    |
| 4          | 32                               | 0               | 0.18 $\pm$ 0.04            | 0.08 $\pm$ 0.02              | 1.14 $\pm$ 0.12                      | 45%                    |
| 5          | 37                               | 0               | 0.09 $\pm$ 0.04            | 0.04 $\pm$ 0.01              | 1.25 $\pm$ 0.17                      | 56%                    |

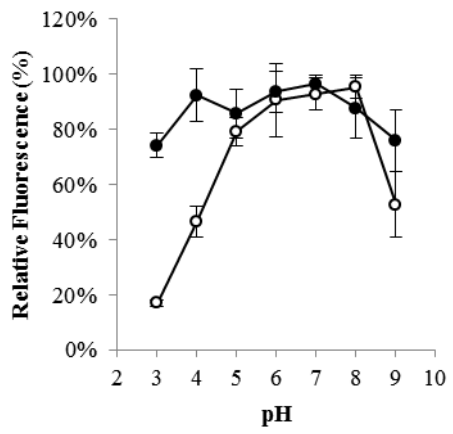

Supplementary Information S3 pH profile of recombinantly produced HisCPC (filled circles) and commercial CPC (empty circles) from *Spirulina* sp. as assayed by fluorescence.

Supplementary Information S4 Loss of fluorescence of HisCPC and CPC during crosslinking with tyrosinase in the presence of L-tyrosine. Reaction mixtures contained 0.2 mg/ml of protein, 0.1 mg/ml of L-tyrosine and 50  $\mu$ g/ml of tyrosinase. Reactions were performed in triplicate at 22°C and monitored for 100 min (values  $\pm$  standard deviation).

| Sample                                            | Residual fluorescence (%) | Fluorescence variation ( $\Delta$ Fluorescence/min) |
|---------------------------------------------------|---------------------------|-----------------------------------------------------|
| CPC alone                                         | 90 $\pm$ 1                | -0.16 $\pm$ 0.04                                    |
| HisCPC alone                                      | 85 $\pm$ 3                | -0.77 $\pm$ 0.26                                    |
| Crosslinked CPC with L-tyrosine and tyrosinase    | 39 $\pm$ 2                | -0.86 $\pm$ 0.06                                    |
| Crosslinked HisCPC with L-tyrosine and tyrosinase | 56 $\pm$ 2                | -2.33 $\pm$ 0.04                                    |

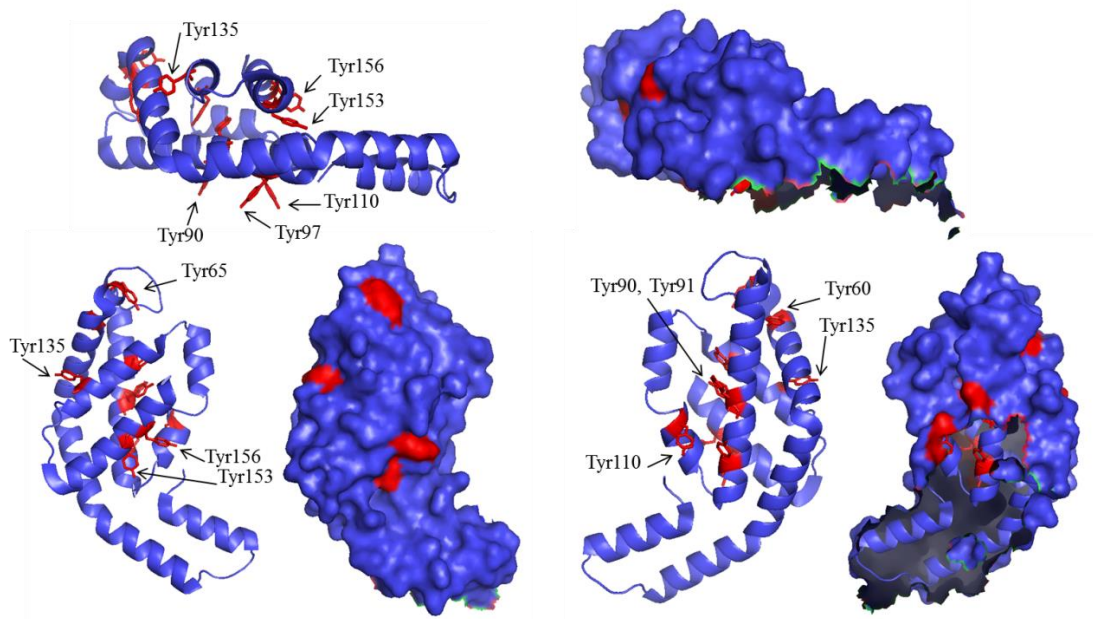

Supplementary Information S5 Three-dimensional structure of  $\alpha$ -subunit of C-phycocyanin from *Synechocystis* sp. PCC 6803 (PDB ID: 4F0T) in a ribbon-stick and surface visualisation. The N-terminal 21 amino acid peptide present in HisCPC is not visualised. The molecule is shown from a side view (top) and from both sides (bottom). The backbone is in blue and tyrosine residues are reported in red as sticks. The incomplete surface of the molecule is due to the interaction with the beta subunit in the crystal. Images were prepared with Pymol (The PyMOL Molecular Graphics System, Version 1.5.0.4 Schrödinger, LLC.).
